# Supplementary material
Source: bioRxiv or medRxiv preprint supplement (https://www.biorxiv.org/highwire/filestream/66870/field_highwire_adjunct_files/2/218883-3.pdf)
Supplement: Supplementary file [file 218883-3.pdf]

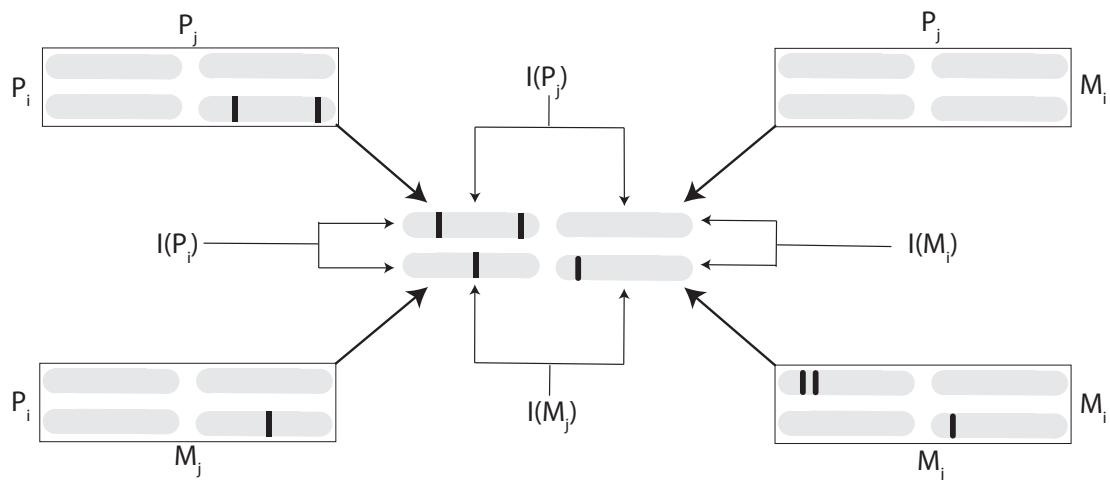

**Supplementary Figure 1. Diagram of determination of offspring relatedness.** The diagram shows how the identity-by-descent sharing states of two individuals  $i$  and  $j$  are determined by the identity-by-descent sharing states of their parents and the segregation events in the parents during meiosis. The identity-by-descent sharing states of  $i$  and  $j$  are represented by the four chromosomes in the centre, with black bands indicating regions shared identical-by-descent. The four chromosomes represent the four possible pairs of homologous chromosomes (maternal-maternal, paternal-maternal, maternal-paternal, and paternal-paternal): the identity-by-descent sharing between the chromosome inherited from  $i$ 's father,  $P_i$ , and  $j$ 's mother,  $M_j$ , etc. The identity-by-descent sharing states of the four possible pairs of parents, one from each individual, are shown in the corners ( $P_i$  and  $P_j$ ,  $P_j$  and  $M_i$ ,  $P_j$  and  $M_i$ , and  $M_j$  and  $M_i$ ). The segregation event in  $i$ 's father is represented by  $I(P_i)$ , the segregation event in  $j$ 's mother represented by  $I(M_j)$ , etc. Note that for simplicity we ignore recombination in this diagram. See the Relatedness Disequilibrium Lemma in the Supplementary Note for a mathematical description of this process and its consequences.

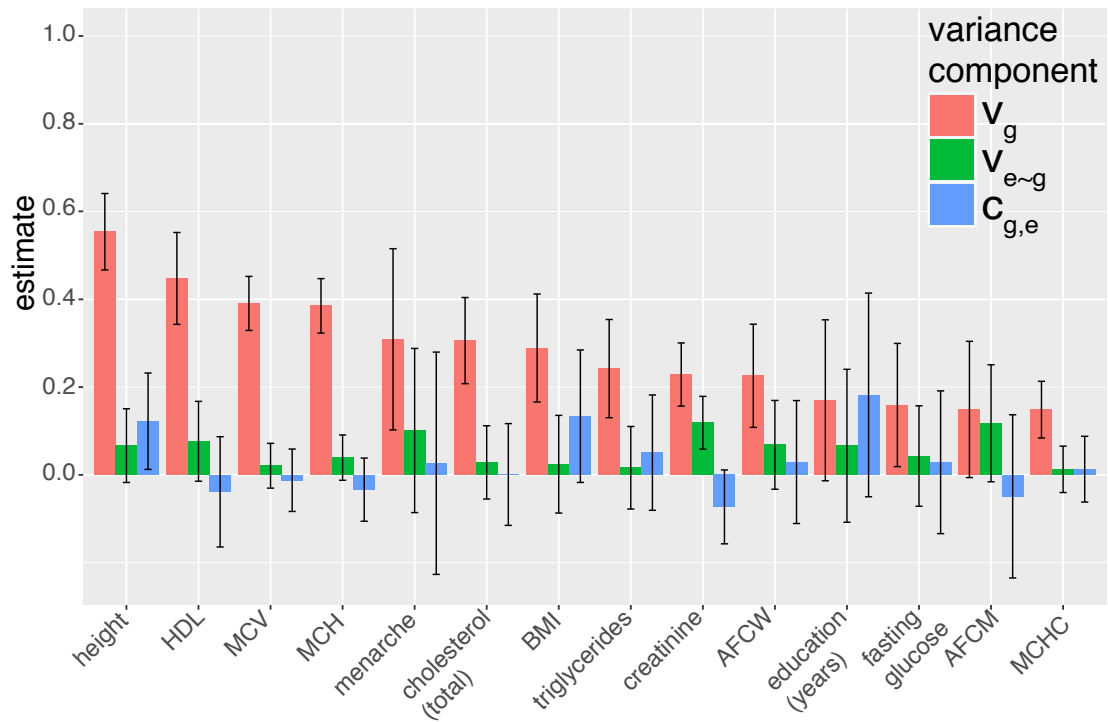

**Supplementary Figure 2. RDR variance component estimates.** Estimated variance components of the RDR covariance model for 14 quantitative traits in Iceland (Supplementary Table 4), expressed as a % of phenotypic variance, shown with intervals  $\pm 1.96$  standard errors around the estimate. Trait abbreviations: BMI, body mass index; AFCW, age at first child in women; AFCM, age at first child in men; education (years), educational attainment (years); HDL, high density lipoprotein; MCH, mean cell haemoglobin; MCHC, mean cell haemoglobin concentration; MCV, mean cell volume.
